1 **cAMP-independent control of twitching motility in *Pseudomonas aeruginosa***

2 Ryan N.C. Buensuceso<sup>1</sup>, Martin Daniel-Ivad<sup>2</sup>, Sara L.N. Kilmury<sup>1</sup>, Hanjeong Harvey<sup>1</sup>, P. Lynne

3 Howell<sup>2,3,\*</sup> and Lori L. Burrows<sup>1,\*</sup>

4

5 <sup>1</sup>Department of Biochemistry and Biomedical Sciences and the Michael G. DeGroote Institute

6 for Infectious Disease Research, McMaster University, ON, CANADA.

7 <sup>2</sup>Program in Molecular Medicine, The Hospital for Sick Children, ON, CANADA.

8 <sup>3</sup>Department of Biochemistry, University of Toronto, ON, CANADA.

9

10

11

12 \*To whom correspondence should be addressed:

13 Dr. Lori L. Burrows, 4H18 Health Sciences Centre, 1200 Main St. West, Hamilton, ON, L8N 3Z5

14 CANADA, Tel: (905)-525-9140 ext: 22029, Fax: (905) 522-9033, E-mail: [burrowl@mcmaster.ca](mailto:burrowl@mcmaster.ca)

15 Dr. P. Lynne Howell, 20-9-715 Peter Gilgan Centre for Research and Learning, 686 Bay St.,

16 Toronto, ON M5G 0A4 CANADA, Tel: (416) 813-5378, Fax: (416) 813-5022, E-mail:

17 [howell@sickkids.ca](mailto:howell@sickkids.ca)

18

19 **ABSTRACT**

20 FimV is a *Pseudomonas aeruginosa* inner membrane hub protein that modulates levels  
21 of the second messenger, cyclic AMP (cAMP), through activation of the adenylate cyclase, CyaB.  
22 Although type IVa pilus (T4aP)-dependent twitching motility is modulated by cAMP levels,  
23 mutants lacking FimV are twitching impaired, even when exogenous cAMP is provided. Here we  
24 further define FimV's cAMP-dependent and -independent regulation of twitching. We  
25 confirmed that the response regulator of the T4aP-associated Chp chemotaxis system, PilG,  
26 required both FimV and the CyaB regulator, FimL, to activate CyaB. However, in cAMP-replete  
27 backgrounds - lacking the cAMP phosphodiesterase CpdA or the CheY-like protein PilH, or  
28 expressing constitutively-active CyaB - *pilG* and *fimV* mutants failed to twitch. Both cytoplasmic  
29 and periplasmic domains of FimV were important for its cAMP-dependent and -independent  
30 roles, while its septal peptidoglycan-targeting LysM motif was required only for twitching  
31 motility. Polar localization of the sensor kinase PilS, a key regulator of transcription of the major  
32 pilin, was FimV-dependent. However, unlike its homologues in other species that localize  
33 flagellar system components, FimV was not required for swimming motility. These data provide  
34 further evidence to support FimV's role as a key hub protein that coordinates the polar  
35 localization and function of multiple structural and regulatory proteins involved in *P. aeruginosa*  
36 twitching motility.

37

38 **IMPORTANCE**

39 *Pseudomonas aeruginosa* is a serious opportunistic pathogen. Type IVa pili (T4aP) are important  
40 for its virulence, because they mediate dissemination and invasion via twitching motility, and

41 are involved in surface sensing which modulates pathogenicity via changes in cAMP levels. Here  
42 we show that the hub protein FimV and the response regulator of the Chp system, PilG, regulate  
43 twitching independently of their roles in modulation of cAMP synthesis. These functions do not  
44 require the putative scaffold protein FimL, proposed to link PilG with FimV. PilG may regulate  
45 asymmetric functioning of the T4aP system to allow for directional movement, while FimV  
46 appears to localize both structural and regulatory elements – including the PilSR two-  
47 component system – to cell poles for optimal function.

48

## 49 INTRODUCTION

50 Type IV pili (T4P) are polar filamentous surface appendages made by a broad range of  
51 bacteria and archaea (1, 2). They can be divided into two sub-families, type IVa (T4aP) and type  
52 IVb (T4bP), which – though clearly related – differ in their pilin subunits and assembly system  
53 architectures (2). T4aP are involved in several processes including DNA uptake, surface  
54 attachment, and twitching motility (3-5). During twitching motility, T4aP undergo repeated  
55 cycles of assembly and disassembly, acting as molecular grappling hooks to pull the cells along  
56 surfaces. Well-studied T4aP model species include *Neisseria spp.*, *Myxococcus xanthus*, and  
57 *Pseudomonas aeruginosa* (6, 7). Although core structural components of the T4aP assembly  
58 machinery and pilus fibre are shared, each species has unique regulatory elements that control  
59 the function of the T4aP machinery in response to their specific environmental requirements.  
60 Without these regulatory proteins, the bacteria make non-functional T4aP systems (8-11).

61 The *P. aeruginosa* Chp system is a putative chemosensory system that controls both  
62 twitching motility and intracellular levels of the second messenger, cyclic adenosine

63 monophosphate (cAMP) (12-14). It resembles the well-studied Che system of *E. coli*, but lacks a  
64 CheZ-like phosphatase. Rather, similar to *Sinorhizobium meliloti* (15), it has two CheY-like  
65 response regulators, PilG and PilH (14, 16). PilG is proposed to regulate activation of CyaB and  
66 pilus extension (17), while PilH has been proposed to be either a phosphate sink that limits  
67 downstream signalling through PilG in lieu of a phosphatase (17, 18), or a separate response  
68 regulator controlling function of the T4aP retraction ATPase, PilT (12).

69         The Chp system positively regulates intracellular levels of cAMP by activating the major  
70 adenylate cyclase, CyaB (17). Deletion of *pilG* results in decreased cAMP, surface piliation, and  
71 twitching motility, while *pilH* mutants have increased cAMP and surface piliation but decreased  
72 twitching relative to wild type (17). Supplementation of a *pilG* mutant with exogenous cAMP  
73 restored surface piliation but not twitching motility (17), suggesting that PilG regulates pilus  
74 biogenesis and function by at least two pathways. A recent study (18) showed that of the two  
75 proteins, PilH is the preferred target of ChpA phosphorylation, consistent with its proposed role  
76 as a phosphate sink. Decreased twitching motility in the *pilH* background may reflect  
77 hyperphosphorylation of PilG, perturbation of the chemotactic response, and uncoordinated  
78 movement.

79         Important for *P. aeruginosa* virulence is its ability to switch from a planktonic to sessile  
80 state when cells contact surfaces (19, 20). T4aP-mediated surface interaction is proposed to  
81 lead to signalling through the Chp system, upregulating surface-associated virulence  
82 phenotypes by increasing intracellular levels of cAMP (20). Vfr (virulence factor regulator) binds  
83 cAMP and modulates the expression of >200 genes, including the type II secretion system (T2SS)  
84 and its effectors, and T4aP assembly components including the motor ATPases PilBTU, the

85 alignment subcomplex PilMNOP, the secretin PilQ, and the PilSR two-component system that  
86 regulates PilA levels (21). This regulatory circuitry allows for just-in-time expression of  
87 components required for a surface-associated lifestyle in response to surface contact.

88 FimV is also required for T4aP function and CyaB activation (17), and is proposed to link  
89 into the Chp system via the cytoplasmic protein, FimL (22). FimV is a 97 kDa inner-membrane  
90 protein with one transmembrane segment. Its periplasmic domain contains a lysin (LysM) motif  
91 that binds peptidoglycan (PG) (23), and its cytoplasmic domain contains three discontinuous  
92 tetratricopeptide repeat (TPR) motifs involved in protein-protein interactions (24). FimV  
93 homologs have been identified in other T4P-producing bacteria (10) although their overall  
94 sequence identity is low, with the most conserved features being the LysM motif (COG3170),  
95 the single transmembrane segment, and a highly conserved cytoplasmic “FimV C-terminal  
96 domain” – TIGR03504 – encompassing a single TPR repeat and capping helix (25).

97 FimV homologs have been characterized in several species (8-11, 26-28), but their  
98 functions are not necessarily conserved. Deletion of FimV in *Legionella pneumophila* resulted in  
99 loss of twitching motility and cell elongation, while deletion of the *Neisseria meningitidis* FimV  
100 homolog TspA led to decreased host cell adhesion but no effect on twitching motility or surface  
101 piliation. The *Vibrio cholerae* homolog, HubP, functions as a protein interaction hub, although its  
102 role is not limited to T4P localization. Deletion of HubP altered the cellular distribution of the  
103 chemotactic and flagellar machinery, and the chromosomal origin, *oriCI* (28). HubP from  
104 *Shewanella putrefaciens* is responsible for localization of the chemotactic machinery, but not the  
105 flagellar system (27). Yamaichi et al. (28) showed that polar localization of *V. cholerae* HubP was  
106 dependent on the conserved LysM motif (25). Wehbi et al. (29) showed that *P. aeruginosa fimV*

107 mutants have decreased levels of the T4aP alignment subcomplex proteins, PilMNOP, while in-  
108 frame deletion of FimV's LysM motif resulted in fewer PilQ multimers, suggesting that PG  
109 binding is important for optimal secretin formation. A recent study (30) confirmed that FimV  
110 participates in localization of PilMNOPQ to sites of future cell division, ultimately placing T4aP  
111 assembly systems at both poles of newly divided cells.

112 T4aP-mediated twitching motility requires both cAMP-dependent and independent  
113 inputs (17). For example, provision of exogenous cAMP to mutants lacking PilG restored  
114 piliation but not motility, and a mutant expressing a constitutively active form of CyaB but  
115 lacking FimV failed to twitch (25). FimL was proposed to be a scaffold protein linking PilG to the  
116 C-terminal TPR motif of FimV, leading to CyaB activation, and FimV localized both FimL and PilG  
117 to cell poles (22, 25). However, of these three proteins, only FimL is dispensable for twitching  
118 motility in cAMP-replete conditions. Thus, the FimV-FimL-PilG model fails to explain the cAMP-  
119 independent roles of FimV and PilG in twitching.

120 Here we provide evidence supporting different cAMP-independent roles for FimV and  
121 PilG in regulation of twitching motility. We show that in addition to polar localization of FimL,  
122 PilG, and PilMNOPQ (22, 30), FimV is responsible for polar localization of PilS, the membrane-  
123 bound sensor kinase that controls *pilA* transcription. These data show that FimV plays a central  
124 role in control of twitching motility that overlaps with – but is distinct from – that of the Chp  
125 system.

126

## 127 **RESULTS**

### 128 **FimV is required for Chp activation of CyaB**

129 FimL, FimV, and PilG are all required for activation of CyaB, with FimL proposed to link  
130 FimV to the Chp system through PilG (17, 22, 31, 32). However, while phenotypes associated  
131 with *fimL* deletion could be rescued by deletion of *cpdA* or by increasing intracellular cAMP  
132 levels in other ways (22, 32, 33), provision of exogenous cAMP failed to restore motility in a *pilG*  
133 mutant (17). We investigated whether the cAMP-independent function of PilG also required  
134 FimV by comparing PilU levels – a proxy for intracellular cAMP levels (21, 25) – twitching, and  
135 piliation in *fimL*, *fimV*, and *pilG* single mutants or in double mutants also lacking *cpdA* to prevent  
136 degradation of endogenous cAMP (32) (**Figure 1**). To confirm that FimV and FimL were epistatic  
137 to PilG, we also examined *pilH fimL* and *pilH fimV* double mutants. In the absence of PilH, cells  
138 are predicted to have hyper-phosphorylated PilG, consistent with the high levels of cAMP  
139 observed in a *pilH* background (17, 18).

140 PilU levels were decreased in *fimL*, *fimV*, and *pilG*, to 28%, 10% and 22% of wild type,  
141 respectively, consistent with roles in regulating cAMP synthesis (10, 12, 17, 32), (**Figure 1**). Both  
142 *pilG* and *fimV* were twitching deficient, while *fimL* twitching resembled that of wild type, as  
143 reported previously (32, 34). The *cpdA* mutant had high levels of PilU, surface piliation, and wild  
144 type twitching, consistent with high cAMP levels (17, 32). Deletion of *cpdA* in *fimL*, *fimV*, or *pilG*  
145 increased PilU levels relative to the corresponding single mutants, to at least wild-type levels  
146 (**Figure 1**), showing that CyaB retains residual activity in those backgrounds. However, only the  
147 *cpdA fimL* mutant was motile, confirming that both PilG and FimV have cAMP-independent roles  
148 in T4aP function. Also consistent with previous reports (17), a *pilH* mutant assembled surface  
149 pili but was twitching impaired (~39% of wild type). The *pilH fimV* and *pilH fimL* double mutants  
150 had PilU levels similar to those of *fimV* and *fimL* single mutants, suggesting that despite its

151 hyper-phosphorylation in the absence of *pilH* (18), PilG was unable to activate CyaB without  
152 FimV or FimL, confirming that all three are required for the Chp system to stimulate cAMP  
153 synthesis.

154

#### 155 **Decreased levels of PilMNOPQ in *fimV* are due to decreased cAMP**

156 Wehbi et al. (29) showed previously that *fimV* mutants had reduced levels of PilMNOP,  
157 and that a *fimV*<sub>ΔLysM</sub> mutant with an in-frame deletion of the LysM motif had fewer PilQ  
158 secretins. However, transcription of the *pilMNOPQ* operon is Vfr- and thus cAMP-dependent  
159 (21). To determine if any of these phenotypes were independent of cAMP, we examined levels  
160 of PilMNOPQ and PilU, and twitching motility in *fimV*, *fimV*<sub>ΔLysM</sub>, a mutant encoding only the  
161 cytoplasmic domain of FimV (*fimV*<sub>1194</sub>), and in a *fimV cyaB-R456L* double mutant that expresses  
162 constitutively active CyaB (25, 35).

163 The *fimV* mutant had low levels of PilU (~23% of wild type), reflecting low cAMP levels,  
164 while the *fimV cyaB-R456L* double mutant had wild type levels of PilU (**Figure 2**). The *fimV*<sub>1194</sub>  
165 mutant had ~29% of wild-type PilU, suggesting that even though its protein partners PilG and  
166 FimL are cytoplasmic, expression of FimV's cytoplasmic domain alone was insufficient to  
167 activate CyaB. Complementation of *fimV* and *fimV*<sub>1194</sub> *in trans* with a construct expressing full-  
168 length FimV increased PilU levels to ~58% and ~65% of wild type, respectively. Surprisingly, the  
169 *fimV*<sub>LysM</sub> mutant had ~89% of wild type PilU, suggesting that the LysM motif and thus PG binding  
170 was dispensable for CyaB activation.

171 The *fimV* mutant had decreased levels of PilMNOP, and few detectable PilQ multimers,  
172 and all were restored to wild type with full-length FimV. Supporting the hypothesis that their



173 levels were dependent on Vfr and cAMP, the *fimV cyaB-R456L* double mutant had wild type  
174 levels of PilMNOPQ. Despite this, the *fimV cyaB-R456L* double mutant had no recoverable  
175 surface pili (**Figure 2**) and could not twitch, confirming a cAMP-independent role(s) for FimV in  
176 pilus assembly and twitching motility. The *fimV<sub>1194</sub>* mutant had low levels of PilMNOP and no  
177 detectable PilQ multimers, but these could be rescued by complementation with full length  
178 FimV. *fimV<sub>ΔLysM</sub>* had essentially wild type PilMNOPQ levels, and could assemble surface pili  
179 (**Figure 2**); however, twitching was ~37% of wild type. The motility defect in *fimV<sub>ΔLysM</sub>* suggests  
180 that PG binding is important for FimV's cAMP-independent function(s).

181 Wehbi et al. (29) showed that the *fimV<sub>1194</sub>* mutant (which expresses the cytoplasmic  
182 domain of FimV) was unable to twitch, but motility could be rescued by complementation with  
183 a plasmid expressing only the periplasmic domain of FimV (residues 1-507, pFimV<sub>507</sub>), suggesting  
184 that together, the two FimV fragments could restore function without being physically  
185 connected. A *fimV* deletion mutant complemented with empty vector or pFimV<sub>507</sub> had similar  
186 PilU levels, suggesting that the periplasmic domain alone is not sufficient to activate CyaB  
187 (**Figure 3A**). Unexpectedly, despite its ability to restore motility in the *fimV<sub>1194</sub>* background  
188 (**Figure 3B**), pFimV<sub>507</sub> did not significantly increase PilU levels in that background, suggesting  
189 that the cytoplasmic and periplasmic domains cannot activate CyaB efficiently when they are  
190 not covalently linked. However, CyaB activation is not strictly required for twitching, as both  
191 *fimL* (**Figure 1**) and *cyoAB* mutants have low cAMP levels and piliation, but near wild-type  
192 motility (17, 32). We next tested if FimV's periplasmic domain played a cAMP-independent role  
193 in twitching by complementing the *fimV cyaB-R456L* mutant with pFimV<sub>507</sub>. pFimV<sub>507</sub> failed to  
194 restore twitching in *fimV cyaB-R456L* (**Figure 3B**), suggesting that the cytoplasmic region of FimV

195 plays a cAMP-independent role in motility. Taken together, the data show that the cAMP-  
196 independent role(s) of FimV requires both domains.

197

### 198 **FimV is required for PilS localization**

199 The *V. cholerae* homolog of FimV, HubP, interacts with multiple proteins and has broad  
200 regulatory function (28). FimV is required for bipolar localization of PilG and FimL and the T4aP  
201 structural proteins PilMNOPQ, but not the Chp methyl-accepting chemotaxis protein (MCP) PilJ  
202 (22, 30). To determine if FimV was required for localization of other T4aP regulators, we  
203 examined its effects on localization of PilS (36, 37), the histidine sensor kinase component of the  
204 PilRS two-component system that regulates *pilA* transcription in response to changes in PilA  
205 levels in the inner membrane (38).

206 In wild-type cells, PilS-YFP was localized to both poles (**Figure 4**) as reported previously  
207 (36), while in the absence of FimV, PilS-YFP was diffuse in the inner membrane. Interestingly,  
208 the localization pattern of PilS-YFP in *fimV*<sub>ΔLysM</sub> was similar to wild type, suggesting that PG-  
209 binding was not critical for PilS localization. However, PilS-YFP was mislocalized in *fimV*<sub>1194</sub>,  
210 suggesting that the cytoplasmic domain is insufficient for PilS localization. Finally, because PilG  
211 also has cAMP-independent effects on motility (17) (**Figure 1**), we examined PilS-YFP localization  
212 in a *pilG* mutant. Localization was similar to wild type, suggesting that PilG and FimV have  
213 distinct cAMP-independent roles in motility (**Figure 4**). These data also suggest that PilS  
214 localization is independent of intracellular cAMP concentration.

215

### 216 **FimV deletion does not affect swimming motility**

217 As the *V. cholerae* and *S. putrefaciens* homologs of FimV modulate swimming motility  
218 (27, 28), we tested whether loss of *fimV* impaired swimming in *P. aeruginosa*. We saw no effect  
219 of FimV deletion on swimming motility (**Figure 5**), suggesting that it is not essential for flagellar  
220 function in *P. aeruginosa*. Consistent with reports that swimming is negatively regulated by high  
221 cAMP (21), the *cpdA* mutant was swimming impaired (~53% relative to wild type). Deletion of  
222 *cpdA* in the *fimV* (~77%), *fimL* (~90%), and *pilG* (~85%) backgrounds reduced swimming relative  
223 to the single mutants, potentially due to increased cAMP levels (**Figure 1**). Surprisingly, despite  
224 having very high cAMP levels (17), and levels of piliation similar to the *cpdA* mutant (**Figure 1**),  
225 *pilH* had ~93% swimming motility relative to wild type (**Figure 5**). This finding suggests that high  
226 levels of cAMP and piliation do not necessarily inhibit swimming motility.

227

## 228 **DISCUSSION**

229 PilG, FimL, and FimV were recently proposed to be components of a surface-sensing  
230 pathway that activates CyaB (22), with FimL acting as a scaffold protein connecting PilG to FimV.  
231 Consistent with this model, we saw that increasing the level of PilG phosphorylation through  
232 deletion of *pilH* (18) failed to increase levels of PilU if either FimV or FimL was missing (**Figure 1**).  
233 However, only the *fimL* mutant twitched (**Figure 1**) following introduction of compensatory  
234 mutations that increased cAMP levels (17, 32), confirming that both PilG and FimV have cAMP-  
235 independent roles in twitching (17, 25). Thus, FimL's role in twitching is limited to its ability to  
236 connect PilG and FimV, leading to CyaB activation via an as-yet unknown mechanism.  
237 Interestingly, Nolan et al. (33) identified other suppressors of *fimL* that mapped outside the

238 *cyaA*, *cyaB*, *pilG*, *pilH*, *vfr*, and *cpdA* loci. How those uncharacterized loci fit into the FimV-FimL-  
239 PilG signalling axis remains to be determined.

240         Since FimL's role is limited to the cAMP-dependent pathway (22, 32) and twitching  
241 motility in the *fimL* background is essentially wild type (**Figure 1**), PilG and FimV both function –  
242 together or independently of one another – in its absence. PilG polar localization is dependent  
243 on FimV, but PilG remains localized to the poles when FimL is absent (22). These data imply that  
244 PilG interacts with FimV directly, or indirectly via another, as-yet unidentified adaptor protein.  
245 That component is unlikely to be part of the Chp system; the MCP PilJ localizes to the poles  
246 independently of FimV, and PilG retains bipolar localization in the absence of both PilJ (**Figure**  
247 **S1**) and the Chp system kinase, ChpA (22). Identifying this interaction partner – potentially  
248 among the list of proteins recovered in a recent PilG pulldown/mass spectrometry study (22)  
249 could help to clarify how PilG contributes to cAMP-independent regulation of twitching.

250         Because restoration of cAMP levels in a *pilG* mutant by supplying exogenous cAMP  
251 (17), constitutively activating CyaB (35), or deleting *cpdA* (**Figure 1A**) restores piliation but not  
252 twitching motility, the cAMP-independent role of PilG may be the coordination of pilus  
253 retraction to permit directional movement. In *M. xanthus*, the Chp-like Frz system controls the  
254 asymmetric subcellular distribution of the PilB and PilT motor ATPases in cells undergoing T4aP-  
255 mediated S-motility, to coordinate movement (39). It is likely that asymmetric T4aP retraction  
256 similarly occurs in *P. aeruginosa*, as pilus retraction at both poles simultaneously would result in  
257 zero net movement.

258         How PilG might regulate pilus retraction remains unclear. CheY interacts with FlIM at the  
259 *E. coli* flagellar switch complex to control the direction of flagellum rotation (40), but the T4aP

260 system lacks an obvious FliM equivalent. However, the T4aP system was recently discovered to  
261 have a rotary motor (41-43). A hexameric PilB or PilT ATPase docks into the PilM ring at the base  
262 of the apparatus and encircles the cytoplasmic domains of the PilC platform protein (7), rotating  
263 it clockwise or counterclockwise, respectively, to insert or extract pilin subunits from the pilus in  
264 a stepwise manner (43). Transient interactions of phospho-PilG with PilM, PilC, or the motor  
265 ATPases might dictate which ATPase is docked at the leading versus lagging pole. In *pilH*  
266 mutants, hyperactivation of PilG may dysregulate asymmetric pilus retraction, leading to  
267 hyperpiliation and impaired motility (**Figure 1A**).

268 Interestingly, the cAMP-independent role of PilG appears dependent on, but distinct  
269 from, that of FimV. In addition to FimL and PilG (22), FimV is required for polar localization of  
270 the structural components PilMNOPQ (30) and the PilSR two-component system (**Figure 4**).  
271 However, unlike its homologues in *V. cholerae* and *S. putrefaciens* (27, 28), its deletion does not  
272 affect swimming (**Figure 5**). FimV and its homologs are emerging as protein interaction hubs  
273 that bind to septal PG via their LysM motif to target their partners to the septum during division,  
274 ensuring the correct placement of polar and partitioning systems during and after separation of  
275 daughter cells (28, 30). Although studies of *L. pneumophila* FimV and *N. meningitidis* TspA (9,  
276 11) did not address the role of the LysM motif or localization in function, the phenotypes of  
277 mutants lacking these proteins could reflect consequent mislocalization of motility or adhesion  
278 systems.

279 Septal PG binding by FimV was dispensable for CyaB activation (**Figure 2**) even though  
280 FimL, PilG, and CyaB are located at the cell poles (22, 32). It is possible that deletion of the LysM  
281 motif alone does not completely mislocalize FimV, as it likely has other interaction partners that

282 help to confine it to the cell poles; attempts to test this hypothesis using a FimV<sub>ΔLysM</sub>-YFP fusion  
283 have not been successful to date. Alternatively, FimV<sub>ΔLysM</sub> may be present at the cell pole due to  
284 diffusion in the inner membrane in sufficient quantities to promote CyaB activity. Consistent  
285 with only partial mislocalization of FimV<sub>ΔLysM</sub>, PilS-YFP remained mostly localized to the poles in  
286 that background, while deletion of FimV's entire periplasmic region led to PilS delocalization  
287 (**Figure 4**). Transmembrane domains 5 and 6 of PilS (44), and the membrane-embedded MASE2  
288 domain of CyaB (35) are sufficient for their polar localization. It is possible that they interact  
289 with FimV via its transmembrane segment, or are integrated into the FimV hub through as-yet  
290 unidentified intermediaries.

291 In summary, this work helps to resolve the cAMP-dependent and independent  
292 regulation of *P. aeruginosa* twitching motility by FimV and PilG. The cAMP-independent role of  
293 FimV is likely coordinate localization of multiple T4aP structural and regulatory components to  
294 the cell poles, while that of PilG may be to control pilus retraction in a way that allows for  
295 directional movement; experiments to test this idea are underway. Characterization of the FimV  
296 protein-interaction network will identify its full repertoire of direct and indirect interaction  
297 partners, and clarify the links between polar localization and function.

298

## 299 **MATERIALS AND METHODS**

### 300 **Bacterial growth and culture conditions**

301 Bacterial strains and plasmids are listed in **Table 1**. Unless otherwise stated,  
302 untransformed *P. aeruginosa* strains and all *E. coli* strains were grown on LB agar at 37 °C.  
303 Antibiotic selection was as follows unless stated otherwise: gentamicin, 15µg/ml for *E. coli* and

304 30µg/ml for *P. aeruginosa*; kanamycin, 50µg/ml for *E. coli*; ampicillin, 100mg/ml for *E. coli*. All *P.*  
305 *aeruginosa* strains containing a FimV complementation construct were grown on media  
306 supplemented with 0.1% (w/v) arabinose.

307

### 308 **Mutant generation**

309 Mutants were made as previously described (17). Deletion constructs for the generation  
310 of *fimL*, *cpdA*, and *fimV* mutants were designed to include 100 nucleotides upstream and  
311 downstream of the gene to be deleted. The *pilH* construct was designed to include the first 12  
312 nucleotides and last 30 nucleotides of the gene. The upstream and downstream fragments were  
313 amplified from the PAK chromosome using the primer sets described in Table 2. Inserts were  
314 cloned into the pEX18Gm suicide vector at the SacI and HindIII sites (pEX18Gm::*fimL*), KpnI and  
315 EcoRI sites (pEX18Gm::*cpdA*), and HindIII and KpnI sites (pEX18Gm::*pilH*). Suicide vectors were  
316 verified by DNA sequencing.

317 After verification, plasmids (pEX18GM::*fimL*, pEX18Gm::*cpdA*, pEX18Gm::*pilH*, and  
318 pEX18Gm::*fimV*<sub>LysM</sub>) were transformed into *E. coli* SM10 cells. Plasmids were transferred to *P.*  
319 *aeruginosa* by conjugation at a ratio of 6:1 (*E. coli* to *P. aeruginosa*). 100 µl of the 6:1 mixed  
320 culture were spotted onto LB 1.5% agar (w/v) and incubated overnight at 37°C. The mating  
321 mixture was resuspended in 5 ml of LB and 100 µl was plated onto *Pseudomonas* isolation agar  
322 supplemented with Gm 100 µg/ml and grown overnight at 37°C. Single colonies were  
323 resuspended in 1 ml LB and plated onto LB 1.5% agar lacking sodium chloride and supplemented  
324 with 8% (w/v) sucrose, and grown overnight at 30°C. Resulting single colonies were replica  
325 plated onto LB and LB supplemented with Gm 30 µg/ml. Mutants were verified by PCR, and the

326 *pilH* mutant was screened by western blotting with anti-PilH antiserum. Double mutants were  
327 generated in the same manner.

328

### 329 **Plasmid construction**

330 The coding region of the first 507 residues of FimV was amplified by PCR using  
331 pBADGr::*fimV* as a template, and cloned into pBADGr. The PCR amplified DNA was digested with,  
332 purified, and ligated into pBADGr at the KpnI and XbaI sites with T4 DNA ligase according to  
333 manufacturer's instructions (Thermo Scientific).

334 A version of *pilS* lacking its stop codon was amplified from the PAK chromosome and  
335 cloned into pBADGr::*yfp* in-frame with *yfp* at the EcoRI and SmaI sites. In-frame ligation was  
336 confirmed by DNA sequencing.

337 A version of PilG lacking its stop codon was amplified from the PAO1 chromosome and  
338 cloned into the pMarkiC vector, which encodes (Gly<sub>3</sub>-Ser)<sub>3</sub>-YFP at the HindIII site of pUCP20Gm.  
339 PilG was ligated into the EcoRI and XbaI sites. In-frame ligation was confirmed by DNA  
340 sequencing.

341

### 342 **Immunoblotting**

343 Western blotting of whole cell lysates was performed as previously described (45). In  
344 brief, whole cell lysates were prepared from strains were grown overnight on LB 1.5% agar, or in  
345 the case of plasmid transformed strains, LB 1.5% agar supplemented with 0.1% (w/v) arabinose.  
346 Cell growth was then resuspended in 1X PBS and normalized to an OD<sub>600</sub> of 0.6. Cells were  
347 pelleted by centrifugation at 2,300 ×g for 5 min. Pellets were then resuspended in 175 μl of 1X



348 SDS-PAGE loading dye. Cell lysates were resolved on 15% SDS-PAGE gels and transferred to  
349 nitrocellulose membranes. Membranes were blocked in 5% skim milk dissolved in PBS (pH 7.4)  
350 for 1 h, washed in PBS, and incubated with PBS-diluted antisera raised against the FimV  
351 periplasmic domain (1:1000), PilU (1:5000), PilM (1:1000), PilN (1:1000), PilO (1:1000), PilP  
352 (1:1000), or PilQ (1:1000), or polyclonal anti-GFP antibody (Novus Biologicals; 1:5000) for 1 h,  
353 washed, incubated with alkaline phosphatase-conjugated goat-anti-rabbit secondary antibody  
354 (1:3000, Bio-Rad) for 1 h, and washed. Blots were developed using 5-bromo-4-chloro-3-  
355 indolylphosphate (BCIP) and nitro blue tetrazolium (NBT). Data are representative of  $n = 3$   
356 independent experiments.

357

#### 358 **Sheared surface protein preparation**

359 Surface pili were analyzed as previously described (46). In brief, strains of interest were  
360 streaked in a grid-like pattern onto LB 1.5% agar, or in the case of plasmid-transformed strains,  
361 LB 1.5% agar supplemented with 0.1% (w/v) arabinose and grown overnight at 37 °C. Cells were  
362 gently scraped from the plates using a sterile coverslip and resuspended in 4.5 ml PBS (pH 7.4).  
363 Surface appendages were sheared by vortexing the cells for 30 s. The  $OD_{600}$  for each strain was  
364 measured, and an amount of cells equivalent to 4.5 ml of the sample with the lowest  $OD_{600}$  was  
365 pelleted by centrifugation at 16,100  $\times g$  for 5 min. When necessary, PBS was added to samples  
366 to a final volume of 4.5 ml prior to centrifugation. Supernatants were removed and centrifuged  
367 again at 16,100  $\times g$  for 20 min to remove remaining cells. Supernatants were collected and  
368 mixed with 5 M NaCl and 30% (w/v) polyethylene glycol (Sigma; molecular weight range ~8000)  
369 to a final concentration of 0.5 M NaCl and 3% (w/v) polyethylene glycol, and incubated on ice

370 for 30 min. Precipitated surface proteins were collected by centrifugation at 16,100 x g for 30  
371 min. Supernatants were discarded and samples were centrifuged again at 16,100 x g for 2 min.  
372 Pellets were resuspended in 150  $\mu$ l of 1X SDS-PAGE sample buffer (80 mM Tris, pH 6.8, 5.3%  
373 (v/v) 2-mercaptoethanol, 10% (v/v) glycerol, 0.02% (w/v) bromophenol blue, 2% (w/v) SDS).  
374 Samples were boiled for 10 min and resolved by 15% SDS-PAGE. Bands were visualized by  
375 staining with Coomassie brilliant blue (Sigma). Data are representative of n = 3 independent  
376 experiments.

377

### 378 **Twitching assay**

379 Twitching motility was tested as previously described (46). In brief, cells from an overnight  
380 culture were stab inoculated to the interface between LB 1% agar, or in the case of plasmid-  
381 transformed strains, LB 1% agar supplemented with 0.1% (w/v) arabinose and the underlying  
382 tissue culture-treated polystyrene petri dish, and incubated at 37 °C for 16 h (Thermo Fisher).  
383 Twitching zones were visualized by removing the agar and staining cells on the petri dish with  
384 1% (w/v) crystal violet and washing with water to remove unbound dye. Twitching zones were  
385 measured by analyzing the diameter of each twitching zone in pixels using ImageJ software  
386 (NIH). Twitching zones were normalized to the twitching diameter of wild type PAK in each  
387 individual experiment. Data are representative of n = 3 independent experiments.

388

### 389 **Fluorescence microscopy**

390 *P. aeruginosa* strains transformed with pBADGr::FimV-eYFP were grown overnight.  
391 Microscopy was performed using 8-well 1.0 borosilicate chambered coverglass (LabTek).

392 Chamber slides were prepared by adding LB 1% agar supplemented with 0.1% (w/v) arabinose  
393 to create an agar layer ~3mm in thickness and covering the bottom of the chamber. Agar was  
394 allowed to solidify with the lid off to prevent condensation. Bacteria were stab inoculated to the  
395 interface between the agar and coverglass. Slides were wrapped in foil to prevent  
396 photobleaching, and incubated at 37°C for 1h in the dark. Cells were then imaged using an EVOS  
397 FL Auto microscope, with a monochrome camera for brightfield imaging and a YFP LED light  
398 cube for fluorescence imaging, through a 60X oil immersion objective at room temperature.  
399 Representative fields were cropped from larger images and enlarged using ImageJ software  
400 (NIH) (47).

401 Fluorescence images were quantified using the MicrobeJ plugin for ImageJ (48).  
402 Brightfield and fluorescence images were arranged into a stack on ImageJ. Regions of interest  
403 corresponding to the bacteria were selected based on the brightfield image, and thresholding  
404 particles based on length (0.5 $\mu$ m-5 $\mu$ m), width (0.2 $\mu$ m-1.5 $\mu$ m), and area (0.75 $\mu$ m<sup>2</sup>-max), and fit  
405 to rod-shaped bacteria. Pixel intensity profiles were generated by MicrobeJ using the profile  
406 option on the fluorescence image, using 1 $\mu$ m width and 0.5 $\mu$ m extensions. Intensity profiles  
407 were plotted along a Y-axis of range 0-140, and the X-axis was partitioned into 50 bins. Pixel  
408 intensity profiles were generated for the YFP channel. Data are representative of at least 3  
409 independent trials.

410

#### 411 **Swimming assay**

412 Cells from overnight cultures were resuspended in sterile PBS and standardized to OD<sub>600</sub>  
413 0.6. Two  $\mu$ l of cell suspension were spotted onto LB 0.3% agar and allowed to dry onto the

414 surface of the agar. Plates were incubated at 30°C for 16h with the agar side down. Data are  
415 representative of n=3 independent experiments.

416 **REFERENCES**

- 417 1. **Albers SV, Pohlschroder M.** 2009. Diversity of archaeal type IV pilin-like structures.  
418 *Extremophiles* **13**:403-410.
- 419 2. **Pellic V.** 2008. Type IV pili: *e pluribus unum*? *Molecular Microbiology* **68**:827-837.
- 420 3. **Averhoff B, Friedrich A.** 2003. Type IV pili-related natural transformation systems: DNA  
421 transport in mesophilic and thermophilic bacteria. *Archives of Microbiology* **180**:385-393.
- 422 4. **Bradley DE.** 1980. A function of *Pseudomonas aeruginosa* PAO polar pili: twitching  
423 motility. *Can J Microbiol* **26**:146-154.
- 424 5. **Burrows LL.** 2005. Weapons of mass retraction. *Mol Microbiol* **57**:878-888.
- 425 6. **Mattick JS.** 2002. Type IV pili and twitching motility. *Annual Review of Microbiology*  
426 **56**:289-314.
- 427 7. **Chang YW, Rettberg LA, Treuner-Lange A, Iwasa J, Sogaard-Andersen L, Jensen GJ.** 2016.  
428 Architecture of the type IVa pilus machine. *Science* **351**:aad2001.
- 429 8. **Siewering K, Jain S, Friedrich C, Webber-Birungi MT, Semchonok DA, Binzen I, Wagner  
430 A, Huntley S, Kahnt J, Klingl A, Boekema EJ, Sogaard-Andersen L, van der Does C.** 2014.  
431 Peptidoglycan-binding protein TsaP functions in surface assembly of type IV pili.  
432 *Proceedings of the National Academy of Sciences of the United States of America*  
433 **111**:E953-961.
- 434 9. **Coil DA, Anne J.** 2010. The role of *fimV* and the importance of its tandem repeat copy  
435 number in twitching motility, pigment production, and morphology in *Legionella*  
436 *pneumophila*. *Archives of Microbiology* **192**:625-631.

- 437 10. **Semmler AB, Whitchurch CB, Leech AJ, Mattick JS.** 2000. Identification of a novel gene,  
438 *fimV*, involved in twitching motility in *Pseudomonas aeruginosa*. *Microbiology* **146 ( Pt**  
439 **6):1321-1332.**
- 440 11. **Oldfield NJ, Bland SJ, Taraktsoglou M, Dos Ramos FJ, Robinson K, Wooldridge KG,**  
441 **Ala'Aldeen DA.** 2007. T-cell stimulating protein A (TspA) of *Neisseria meningitidis* is  
442 required for optimal adhesion to human cells. *Cellular Microbiology* **9:463-478.**
- 443 12. **Bertrand JJ, West JT, Engel JN.** 2010. Genetic analysis of the regulation of type IV pilus  
444 function by the Chp chemosensory system of *Pseudomonas aeruginosa*. *Journal of*  
445 *Bacteriology* **192:994-1010.**
- 446 13. **Whitchurch CB, Leech AJ, Young MD, Kennedy D, Sargent JL, Bertrand JJ, Semmler AB,**  
447 **Mellick AS, Martin PR, Alm RA, Hobbs M, Beatson SA, Huang B, Nguyen L, Commolli JC,**  
448 **Engel JN, Darzins A, Mattick JS.** 2004. Characterization of a complex chemosensory  
449 signal transduction system which controls twitching motility in *Pseudomonas aeruginosa*.  
450 *Molecular Microbiology* **52:873-893.**
- 451 14. **Darzins A.** 1994. Characterization of a *Pseudomonas aeruginosa* gene cluster involved in  
452 pilus biosynthesis and twitching motility: sequence similarity to the chemotaxis proteins  
453 of enterics and the gliding bacterium *Myxococcus xanthus*. *Molecular Microbiology*  
454 **11:137-153.**
- 455 15. **Sourjik V, Schmitt R.** 1998. Phosphotransfer between CheA, CheY1, and CheY2 in the  
456 chemotaxis signal transduction chain of *Rhizobium meliloti*. *Biochemistry* **37:2327-2335.**

- 457 16. **Darzins A.** 1993. The *pilG* gene product, required for *Pseudomonas aeruginosa* pilus  
458 production and twitching motility, is homologous to the enteric, single-domain response  
459 regulator CheY. *Journal of Bacteriology* **175**:5934-5944.
- 460 17. **Fulcher NB, Holliday PM, Klem E, Cann MJ, Wolfgang MC.** 2010. The *Pseudomonas*  
461 *aeruginosa* Chp chemosensory system regulates intracellular cAMP levels by modulating  
462 adenylate cyclase activity. *Mol Microbiol* **76**:889-904.
- 463 18. **Silversmith RE, Wang B, Fulcher NB, Wolfgang MC, Bourret RB.** 2016. Phosphoryl Group  
464 Flow within the *Pseudomonas aeruginosa* Pil-Chp Chemosensory System: Differential  
465 Function Of The Eight Phosphotransferase And Three Receiver Domains. *J Biol Chem*  
466 **291**:17677-17691.
- 467 19. **Luo Y, Zhao K, Baker AE, Kuchma SL, Coggan KA, Wolfgang MC, Wong GC, O'Toole GA.**  
468 2015. A hierarchical cascade of second messengers regulates *Pseudomonas aeruginosa*  
469 surface behaviors. *mBio* **6**.
- 470 20. **Persat A, Inclan YF, Engel JN, Stone HA, Gitai Z.** 2015. Type IV pili mechanochemically  
471 regulate virulence factors in *Pseudomonas aeruginosa*. *Proc Natl Acad Sci U S A*  
472 **112**:7563-7568.
- 473 21. **Wolfgang MC, Lee VT, Gilmore ME, Lory S.** 2003. Coordinate regulation of bacterial  
474 virulence genes by a novel adenylate cyclase-dependent signaling pathway.  
475 *Developmental Cell* **4**:253-263.
- 476 22. **Inclan YF, Persat A, Greninger A, Von Dollen J, Johnson J, Krogan N, Gitai Z, Engel JN.**  
477 2016. A scaffold protein connects type IV pili with the Chp chemosensory system to

- 478 mediate activation of virulence signaling in *Pseudomonas aeruginosa*. Mol Microbiol  
479 **101**:590-605.
- 480 23. **Buist G, Steen A, Kok J, Kuipers OP**. 2008. LysM, a widely distributed protein motif for  
481 binding to (peptido)glycans. Molecular Microbiology **68**:838-847.
- 482 24. **Blatch GL, Lasse M**. 1999. The tetratricopeptide repeat: a structural motif mediating  
483 protein-protein interactions. BioEssays **21**:932-939.
- 484 25. **Buensuceso RN, Nguyen Y, Zhang K, Daniel-Ivad M, Sugiman-Marangos SN, Fleetwood  
485 AD, Zhulin IB, Junop MS, Howell PL, Burrows LL**. 2016. The Conserved Tetratricopeptide  
486 Repeat-Containing C-Terminal Domain of *Pseudomonas aeruginosa* FimV Is Required for  
487 Its Cyclic AMP-Dependent and -Independent Functions. J Bacteriol **198**:2263-2274.
- 488 26. **Coil DA, Vandersmissen L, Ginevra C, Jarraud S, Lammertyn E, Anne J**. 2008. Intragenic  
489 tandem repeat variation between *Legionella pneumophila* strains. BMC Microbiology  
490 **8**:218.
- 491 27. **Rossmann F, Brenzinger S, Knauer C, Dorrich AK, Bubendorfer S, Ruppert U, Bange G,  
492 Thormann KM**. 2015. The role of FlhF and HubP as polar landmark proteins in  
493 *Shewanella putrefaciens* CN-32. Molecular Microbiology **98**:727-742.
- 494 28. **Yamaichi Y, Bruckner R, Ringgaard S, Moll A, Cameron DE, Briegel A, Jensen GJ, Davis  
495 BM, Waldor MK**. 2012. A multidomain hub anchors the chromosome segregation and  
496 chemotactic machinery to the bacterial pole. Genes & Development **26**:2348-2360.
- 497 29. **Wehbi H, Portillo E, Harvey H, Shimkoff AE, Scheurwater EM, Howell PL, Burrows LL**.  
498 2010. The peptidoglycan-binding protein FimV promotes assembly of the *Pseudomonas*  
499 *aeruginosa* type IV pilus secretin. J Bacteriol **193**:540-550.



- 500 30. **Carter T, Buensuceso RN, Tammam S, Lamers RP, Harvey H, Howell PL, Burrows LL.**  
501 2017. The Type IVa Pilus Machinery Is Recruited to Sites of Future Cell Division. *MBio*  
502 **8(1):e02103-16**
- 503 31. **Fuchs EL, Brutinel ED, Jones AK, Fulcher NB, Urbanowski ML, Yahr TL, Wolfgang MC.**  
504 2010. The *Pseudomonas aeruginosa* Vfr regulator controls global virulence factor  
505 expression through cyclic AMP-dependent and -independent mechanisms. *Journal of*  
506 *Bacteriology* **192:3553-3564.**
- 507 32. **Inclan YF, Huseby MJ, Engel JN.** 2011. FimL regulates cAMP synthesis in *Pseudomonas*  
508 *aeruginosa*. *PLoS One* **6:e15867.**
- 509 33. **Nolan LM, Beatson SA, Croft L, Jones PM, George AM, Mattick JS, Turnbull L,**  
510 **Whitchurch CB.** 2012. Extragenic suppressor mutations that restore twitching motility to  
511 *fimL* mutants of *Pseudomonas aeruginosa* are associated with elevated intracellular  
512 cyclic AMP levels. *MicrobiologyOpen* **1:490-501.**
- 513 34. **Whitchurch CB, Beatson SA, Comolli JC, Jakobsen T, Sargent JL, Bertrand JJ, West J,**  
514 **Klausen M, Waite LL, Kang PJ, Tolker-Nielsen T, Mattick JS, Engel JN.** 2005.  
515 *Pseudomonas aeruginosa fimL* regulates multiple virulence functions by intersecting  
516 with Vfr-modulated pathways. *Molecular Microbiology* **55:1357-1378.**
- 517 35. **Topal H, Fulcher NB, Bitterman J, Salazar E, Buck J, Levin LR, Cann MJ, Wolfgang MC,**  
518 **Steebhorn C.** 2012. Crystal structure and regulation mechanisms of the CyaB adenylyl  
519 cyclase from the human pathogen *Pseudomonas aeruginosa*. *Journal of Molecular*  
520 *Biology* **416:271-286.**

- 521 36. **Boyd JM.** 2000. Localization of the histidine kinase PilS to the poles of *Pseudomonas*  
522 *aeruginosa* and identification of a localization domain. *Mol Microbiol* **36**:153-162.
- 523 37. **Boyd JM, Koga T, Lory S.** 1994. Identification and characterization of PilS, an essential  
524 regulator of pilin expression in *Pseudomonas aeruginosa*. *Mol Gen Genet* **243**:565-574.
- 525 38. **Kilmury SL, Burrows LL.** 2016. Type IV pilins regulate their own expression via direct  
526 intramembrane interactions with the sensor kinase PilS. *Proc Natl Acad Sci U S A*  
527 **113**:6017-6022.
- 528 39. **Bulyha I, Schmidt C, Lenz P, Jakovljevic V, Hone A, Maier B, Hoppert M, Sogaard-**  
529 **Andersen L.** 2009. Regulation of the type IV pili molecular machine by dynamic  
530 localization of two motor proteins. *Molecular Microbiology* **74**:691-706.
- 531 40. **Bren A, Eisenbach M.** 1998. The N terminus of the flagellar switch protein, FliM, is the  
532 binding domain for the chemotactic response regulator, CheY. *J Mol Biol* **278**:507-514.
- 533 41. **Mancl JM, Black WP, Robinson H, Yang Z, Schubot FD.** 2016. Crystal Structure of a Type  
534 IV Pilus Assembly ATPase: Insights into the Molecular Mechanism of PilB from *Thermus*  
535 *thermophilus*. *Structure* **24**:1886-1897.
- 536 42. **Tsai CL, Tainer JA.** 2016. The ATPase Motor Turns for Type IV Pilus Assembly. *Structure*  
537 **24**:1857-1859.
- 538 43. **McCallum M, Tammam S, Khan A, Burrows LL, Howell PL.** 2016. The molecular  
539 mechanism of the type IVa pilus motors. *Nature Communications*, **in press**.
- 540 44. **Ethier J, Boyd JM.** 2000. Topological analysis and role of the transmembrane domain in  
541 polar targeting of PilS, a *Pseudomonas aeruginosa* sensor kinase. *Mol Microbiol* **38**:891-  
542 903.

- 543 45. **Ayers M, Sampaleanu LM, Tammam S, Koo J, Harvey H, Howell PL, Burrows LL.** 2009.  
544 PilM/N/O/P proteins form an inner membrane complex that affects the stability of the  
545 *Pseudomonas aeruginosa* type IV pilus secretin. *J Mol Biol* **394**:128-142.
- 546 46. **Kus JV, Tullis E, Cvitkovitch DG, Burrows LL.** 2004. Significant differences in type IV pilin  
547 allele distribution among *Pseudomonas aeruginosa* isolates from cystic fibrosis (CF)  
548 versus non-CF patients. *Microbiology* **150**:1315-1326.
- 549 47. **Schneider CA, Rasband WS, Eliceiri KW.** 2012. NIH Image to ImageJ: 25 years of image  
550 analysis. *Nature Methods* **9**:671-675.
- 551 48. **Ducret A, Quardokus EM, Brun YV.** 2016. MicrobeJ, a tool for high throughput bacterial  
552 cell detection and quantitative analysis. *Nat Microbiol* **1**:16077.
- 553 49. **Watson AA, Mattick JS, Alm RA.** 1996. Functional expression of heterologous type 4  
554 fimbriae in *Pseudomonas aeruginosa*. *Gene* **175**:143-150.
- 555 50. **Simon V, Schumann W.** 1987. In vivo formation of gene fusions in *Pseudomonas putida*  
556 and construction of versatile broad-host-range vectors for direct subcloning of Mu d1  
557 and Mu d2 fusions. *Appl Environ Microbiol* **53**:1649-1654.
- 558 51. **Asikyan ML, Kus JV, Burrows LL.** 2008. Novel proteins that modulate type IV pilus  
559 retraction dynamics in *Pseudomonas aeruginosa*. *J Bacteriol* **190**:7022-7034.

560

561

562

563

564

565 **Table 1 – Strains and plasmids used in this study.**

| Strains                     | Genotype/Description                                                                                     | Source     |
|-----------------------------|----------------------------------------------------------------------------------------------------------|------------|
| <i>P. aeruginosa</i>        |                                                                                                          |            |
| PAK                         | Wild type <i>P. aeruginosa</i> strain K                                                                  | (17)       |
| NP                          | PAK with a deletion of <i>pilA</i>                                                                       | (49)       |
| <i>pilU</i>                 | PAK with a deletion of <i>pilU</i>                                                                       | (25)       |
| <i>fimV</i>                 | PAK with a deletion of <i>fimV</i>                                                                       | (25)       |
| <i>fimV</i> <sub>LysM</sub> | PAK with an in-frame deletion of the LysM motif, nucleotides 519-690                                     | This study |
| <i>fimV cyaB-R456L</i>      | PAK with a deletion of <i>fimV</i> and an arginine to lysine substitution in <i>cyaB</i> at position 456 | (25)       |
| <i>fimV1194</i>             | PAK with an FRT insertion at nucleotide position 1194 in <i>fimV</i>                                     | (25)       |
| <i>fimL</i>                 | PAK with a deletion of <i>fimL</i>                                                                       | This study |
| <i>pilG</i>                 | PAK with a deletion of <i>pilG</i>                                                                       | (17)       |
| <i>cpdA</i>                 | PAK with a deletion of <i>cpdA</i>                                                                       | This study |
| <i>cpdA fimV</i>            | PAK with deletions of <i>cpdA</i> and <i>fimV</i>                                                        | This study |
| <i>cpdA fimL</i>            | PAK with deletions of <i>cpdA</i> and <i>fimL</i>                                                        | This study |
| <i>cpdA pilG</i>            | PAK with deletions of <i>cpdA</i> and <i>pilG</i>                                                        | This study |
| <i>pilH</i>                 | PAK with a deletion of <i>pilH</i>                                                                       | This study |
| <i>pilH fimV</i>            | PAK with deletions of <i>pilH</i> and <i>fimV</i>                                                        | This study |

| <i>pilH fimL</i>        | PAK with deletions of <i>pilH</i> and <i>fimL</i>                                                                                                                                                                                                            | This study |
|-------------------------|--------------------------------------------------------------------------------------------------------------------------------------------------------------------------------------------------------------------------------------------------------------|------------|
| <i>E. coli</i>          |                                                                                                                                                                                                                                                              |            |
| DH5a                    | F-, $\Phi 80lacZ\Delta M15$ , $\Delta(lacZYA-argF)$ ,<br><i>U169</i> , <i>recA1</i> , <i>endA1</i> , <i>hsdR17(rk-</i> ,<br><i>mk+)</i> , <i>phoA</i> , <i>supE44</i> , <i>thi-1</i> , <i>gyrA96</i> , <i>relA1</i> , $\lambda$ -;<br>General cloning strain | Invitrogen |
| SM10                    | <i>thi-1 thr leu tonA lacy supE recARP42`-2 Tcr::Mu</i><br>Kmr; mating donor strain                                                                                                                                                                          | (50)       |
| Plasmids                |                                                                                                                                                                                                                                                              |            |
| pBADGr                  | Arabinose-inducible expression construct                                                                                                                                                                                                                     | (51)       |
| pBADGr:: <i>fimV</i>    | Arabinose-inducible expression construct<br>encoding full length FimV                                                                                                                                                                                        | (25)       |
| pBADGr:: <i>fimV507</i> | Arabinose-inducible expression construct<br>encoding the periplasmic domain of FimV,<br>residues 1-507                                                                                                                                                       | This study |
| pEX18Gm:: <i>fimL</i>   | Suicide vector containing 1kb upstream and<br>downstream from the <i>fimL</i> locus                                                                                                                                                                          | This study |
| pEX18Gm:: <i>cpdA</i>   | Suicide vector containing 1kb upstream and<br>downstream from the <i>cpdA</i> locus                                                                                                                                                                          | This study |
| pEX18Gm:: <i>pilH</i>   | Suicide vector containing 1kb upstream and<br>downstream from the <i>pilH</i> locus                                                                                                                                                                          | This study |

|                                      |                                                                                                                                                        |            |
|--------------------------------------|--------------------------------------------------------------------------------------------------------------------------------------------------------|------------|
| pEX18Ap- <i>fimV</i> -GmFRT          | Suicide vector containing <i>fimV</i> amplified from PAO1 and disrupted at nucleotide position 1194 with an FRT-flanked gentamicin resistance cassette | (29)       |
| pEX18Gm- <i>fimV</i> - $\Delta$ LysM | Suicide vector containing residues 1-1521 of <i>fimV</i> with a deletion of nucleotides 519-690                                                        | (29)       |
| pBADGr::eYFP(HinDIII)                | Arabinose-inducible expression construct encoding eYFP cloned into the HinDIII site                                                                    | (30)       |
| pBADGr::PilS-YFP                     | Arabinose-inducible expression construct with pilS cloned upstream of eYFP                                                                             | This study |
| pMarkiC                              | puCP20Gm-based vector with (Gly <sub>3</sub> -Ser) <sub>3</sub> -YFP cloned in at the HinDIII site                                                     | This study |
| pMarkiC::pilG                        | pMarkiC with PilG cloned into the EcoRI and XbaI sites                                                                                                 | This study |

566

567

568 **Table 2 – List of oligonucleotides used in this study**

| Primers                | Sequence                                                           |
|------------------------|--------------------------------------------------------------------|
| FimV-F                 | 5' - GCGGGTACCATGGTTCGGCTTCGTACTGGTTCGGG - 3'                      |
| FimV <sub>507</sub> -R | 5' - GCGTCTAGACTAGTGGTGATGGTGATGATGCTGTTCTCGCCGGTATCCGCGGC -<br>3' |
| PilS YFP-F             | 5'-GACGAATTCATGCGCGCTGAACGGCTA-3'                                  |
| PilS YFP-R             | 5'-GCACCCGGGTGCTGAGTTTGCGTGGGTGGGC-3'                              |
| ko FimL F1             | 5' CGCGAGCTCAATGGGCGTGCCGTGCATCA -3'                               |
| ko FimL R1             | 5'- CGCGGATCCCGGTCTAGTGCCTCCC -3'                                  |
| ko FimL F2             | 5'- CGCGGATCCTGGCCGGCGAGTTCCGCT -3'                                |
| ko FimL R2             | 5'- CGCAAGCTTGGACCGTCAGCTCGCTGCTC -3'                              |
| ko cpdA F1             | 5' - TCAAGCTTGGATCAGCTCGACGCCCGGCA - 3'                            |
| ko cpdA R1             | 5' - TCGGTACCTCTTCGAAGTGGACTACGACA - 3'                            |
| ko cpdA F2             | 5' - TACGGTACCAGGCGTCGGTGGCGGGAGT - 3'                             |
| ko cpdA R2             | 5' - TCGAATTCACGACCCGCAGCGCGATTG C - 3'                            |
| ko pilH F1             | 5' -GCGAAGCTTCGTTATCGAAGGGCGGGTCC - 3'                             |
| ko pilH R1             | 5' - GGGTCTAGAATCAACAATCAAATACGAGCCATGGGG - 3'                     |
| ko pilH F2             | 5' - GGGTCTAGAAATGCGGTGCTGGCGGGCTGA - 3'                           |
| ko pilH R2             | 5' - GCGGGTACCCGTTTCTCGAAGTCGTTGCG - 3'                            |
| G_MarkiC_F             | 5'-ATTTAAGAATTCAGGAGGATATATATGGAACAGCAATCCGACG - 3'                |
| G_MarkiC_R             | 5'-AATCATTCTAGAGGAAACGGCGTCCACCGGG - 3'                            |

569

570 **Figure Captions**

571 **Figure 1. FimV and PilG have separate cAMP-independent roles in T4aP function. A.** Loss of

572 *fimL* reduces the levels of PilU (a proxy for intracellular cAMP levels), surface piliation, and

573 twitching motility, and all phenotypes are restored to wild type levels in a *cdpA fimL* double

574 mutant. In contrast, *fimV* and *pilG* mutants lack surface piliation and motility even in a *cdpA*

575 background, while PilU levels are restored to wild type or greater. Scale bar = 1 cm. **B.**

576 Quantification of relative PilU levels and twitching zone diameters compared to wild type PAK

577 set to 100%; measurements are the average of n=3. Matching letters indicate statistically

578 significant differences at p<0.05.

579

580 **Figure 2. FimV, and its ability to bind PG, are essential for motility.**

581 **A.** Schematic of FimV fragments used in this work. FimV's periplasmic and cytoplasmic domains

582 are connected by a single transmembrane segment. The N-terminal periplasmic domain

583 contains a PG-binding LysM motif (green square), which is deleted in-frame in the *fimV<sub>ΔLysM</sub>*

584 mutant (white square). **B.** The levels of PilU (a proxy for intracellular cAMP levels; (25)), and

585 assembly machinery components PilMNOPQ were assessed by Western blot in various *fimV*

586 backgrounds, complemented with empty vector or with full-length *fimV*; a representative blot is

587 shown. Surface piliation and twitching motility are shown in the bottom two rows. Scale bar = 1

588 cm. **C.** Quantification of protein levels and motility, n = 3. Note that PilQ multimer levels cannot

589 be accurately quantified by this method. In the absence of *fimV*, levels of PilU, PilN, and PilO and

590 PilQ multimers were reduced, and surface piliation and motility were lost. These phenotypes

591 were restored by complementation with *fimV* in trans. *fimV<sub>1194</sub>* expressing only the cytoplasmic



592 domain phenocopied the *fimV* deletion mutant. When FimV's LysM motif was deleted, levels of  
593 the proteins of interest and piliation were similar to wild type, but motility remained severely  
594 impaired. CyaB requires FimV for its activity, but in the absence of *fimV* can be constitutively  
595 activated by the R456L mutation (35). However, the cells have very few surface pili and are non-  
596 motile.

597  
598 **Figure 3. CyaB activation - but not twitching motility - requires that FimV's cytoplasmic and**  
599 **periplasmic domains be connected. A.** Representative Western blot of whole cell lysates with  
600 anti-PilU antiserum, and quantification of PilU levels (a intracellular for cAMP levels) by  
601 densitometry, n = 3. The reduced levels of PilU in *fimV* and *fimV*<sub>1194</sub> mutants are not restored to  
602 wild type by *in trans* expression of the N-terminal domain (FimV<sub>507</sub>). **B.** Quantification of  
603 twitching motility. As reported previously (29), expression of pFimV<sub>507</sub> *in trans* complements  
604 motility in the *fimV*<sub>1194</sub> mutant that expresses the cytoplasmic domain of FimV. It cannot  
605 complement motility of a *fimV* mutant, even when cAMP levels are restored in a background  
606 expressing constitutively-active CyaB-R456L.

607  
608 **Figure 4. PilS localization is dependent on FimV.** Brightfield and fluorescence microscopy was  
609 used to image PilS-YFP localization in the wild type, *fimV* mutants, or a *pilG* mutant and the  
610 average pixel intensity of the YFP signal along the long axis of the cell was quantified using  
611 MicrobeJ (48). The number of cells averaged for each population is shown on the graph. PilS-YFP  
612 is localized to the poles in wild type cells but fluorescence becomes circumferential in the *fimV*  
613 and *fimV*<sub>1194</sub> backgrounds. In a mutant expressing FimV with an in-frame deletion of its LysM

614 peptidoglycan-binding motif, fluorescence is polar but patchy circumferential fluorescence is  
615 also visible. PilS-YFP localization remains polar in a *pilG* mutant. Scale bar = 5  $\mu$ m.

616

617 **Figure 5. Swimming motility of PAK wild type and mutant strains. A.** Representative swimming  
618 motility assays in 0.3% LB agar. Scale bar = 1 cm. **B.** Quantification of swimming zones, average  
619 of n = 3. Lowercase letters indicate paired samples that are statistically different from one  
620 another. Loss of *fimV* does not impact swimming motility. PAK is the parent strain; the *fliC*  
621 mutant that lacks flagellin was included for comparison.

**A.**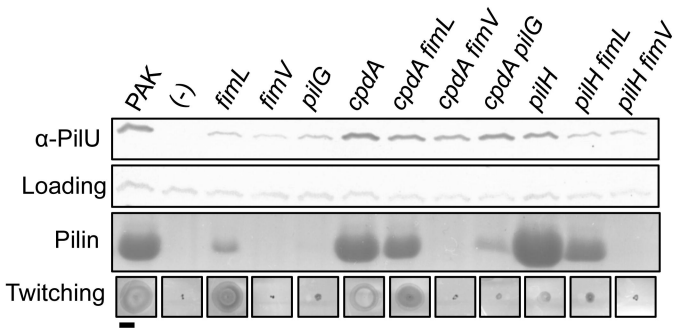**B.**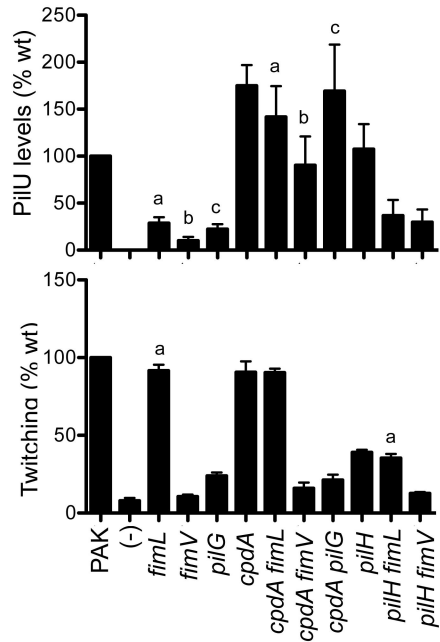



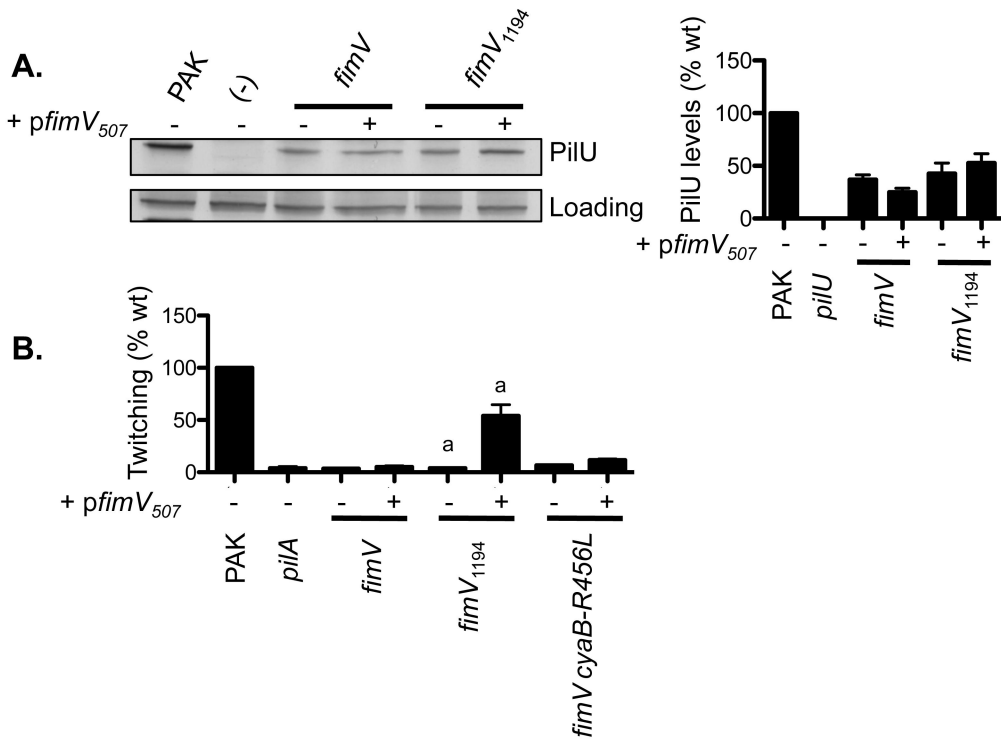

Brightfield

YFP-PilS

PAK

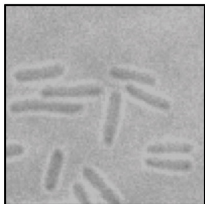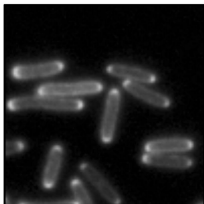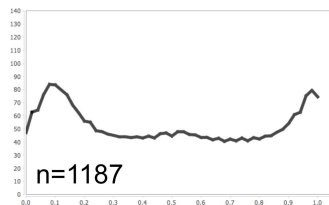*fimV*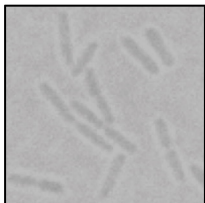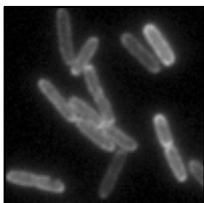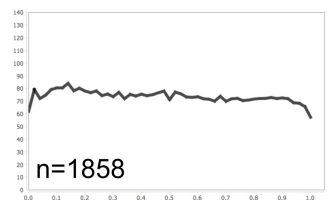*fimV<sub>LysM</sub>*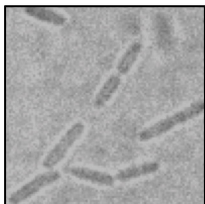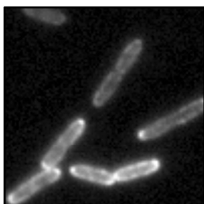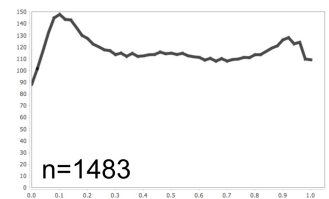*fimV<sub>1194</sub>*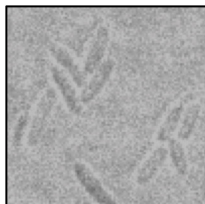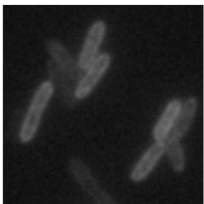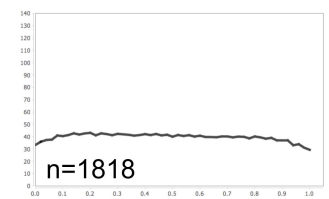*pilG*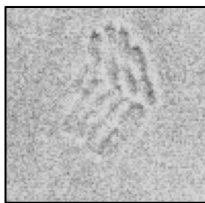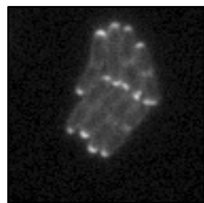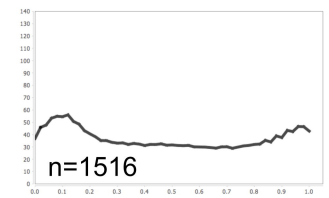

Pixel intensity ↑

Position →

**A.**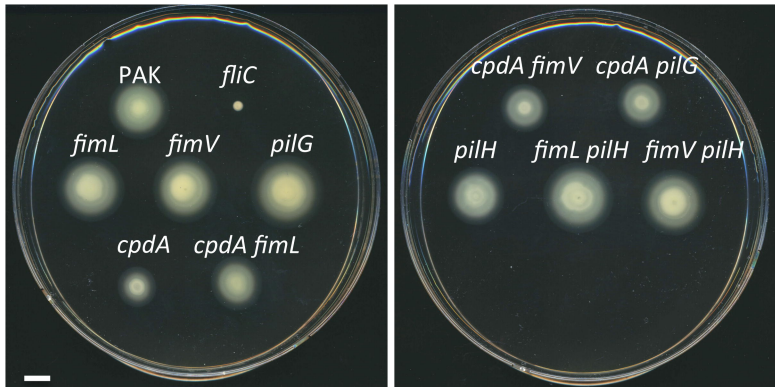**B.**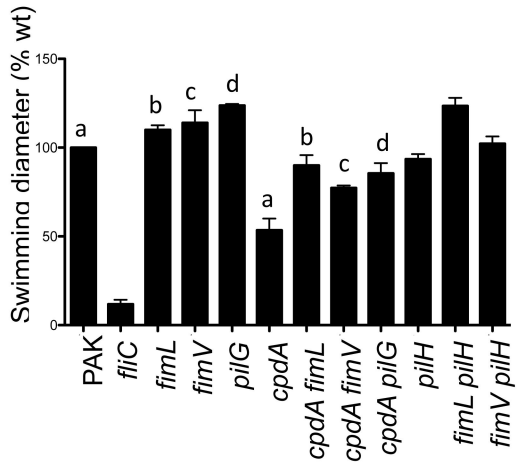

Source: http://biorxiv.org/content/10.1101/116954v2.full.pdf
